# Supplementary material
Source: PubMed Central journal article supplement (PMC2917040)
Supplement: NIHMS165391-supplement-supp_mat.pdf [file NIHMS165391-supplement-supp_mat.pdf]

## SUPPLEMENTAL FIGURE LEGENDS

### **Figure S1. Melanin production is decreased in *sre1Δ* and *stp1Δ* strains.**

Melanin production was estimated by spotting serially diluted yeast cells from the indicated strains onto norepinephrine-containing medium. The plates were then incubated for 2 days at 30°C in the dark.

### **Figure S2. Capsule size of *sre1Δ* and *stp1Δ* cells is similar to wild-type.**

Capsule size of 100 cells was measured in India Ink preparations. Error bars denote standard deviation.

### **Figure S3. Scp1 levels in *stp1Δ* cells are similar to wild-type.**

Wild-type, *sre1Δ*, *stp1Δ* and *scp1Δ* cells were grown to log phase under normoxic conditions. Microsomal fractions were harvested from cell lysates and subjected to immunoblot analysis using anti-Scp1 (amino acids 771-1444) antiserum.

### **Figure S4. Brefeldin A treatment accumulates Sre1 precursor in *stp1Δ* cells.**

Wild-type, *sre1Δ* and *stp1Δ* strains were grown for two hours in the absence or presence of 100 μg/ml Brefeldin A (BFA), either alone or without 15 nM itraconazole. Immunoblot analysis to detect Sre1 precursor was performed on whole cell extracts using anti-Sre1 antiserum. Asterisks indicate non-specific, cross-reacting proteins detected by anti-Sre1 antiserum.

## SUPPLEMENTAL METHODS

### **Melanin Production Assay**

Two-fold serial dilutions of yeast cells (starting at  $3 \times 10^5$  cells) were spotted onto norepinephrine-containing plates and grown for 2 days at 30°C in the dark (Erickson *et al.*, 2001).

### **Capsule Measurements**

To determine capsule size in vitro, cells were grown on RPMI medium at 30°C for 1 day to induce capsule production. Capsule size was measured in India Ink preparations under oil immersion (100X). Pictures were taken with a Zeiss Axiovert 200 and AxioCam camera (Carl Zeiss, NY). At least three different fields were randomly chosen and photographed. The distance from the edge of the capsule to the cell wall of 100 cells from each strain was measured and averaged (Chang *et al.*, 2007).

## SUPPLEMENTAL REFERENCES

Chang, Y.C., Bien, C.M., Lee, H., Espenshade, P.J., and Kwon-Chung, K.J. (2007) Sre1p, a regulator of oxygen sensing and sterol homeostasis, is required for virulence in *Cryptococcus neoformans* *Mol. Microbiol.* **64**: 614-629.

Erickson, T., Liu, L., Gueyikian, A., Zhu, X.D., Gibbons, J., and Williamson, P.R. (2001) Multiple virulence factors of *Cryptococcus neoformans* are dependent on VPH1 *Molecular Microbiology* **42**: 1121-1131.

**Figure S1**

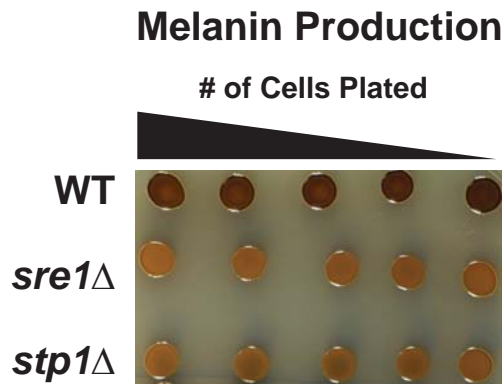

**Figure S2**

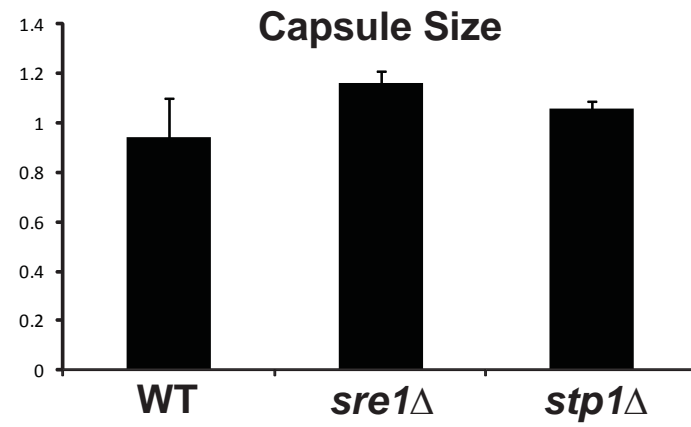

**Figure S3**

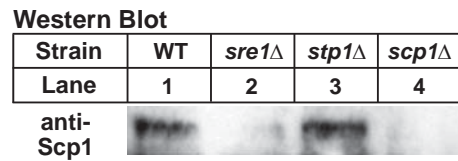

**Figure S4**

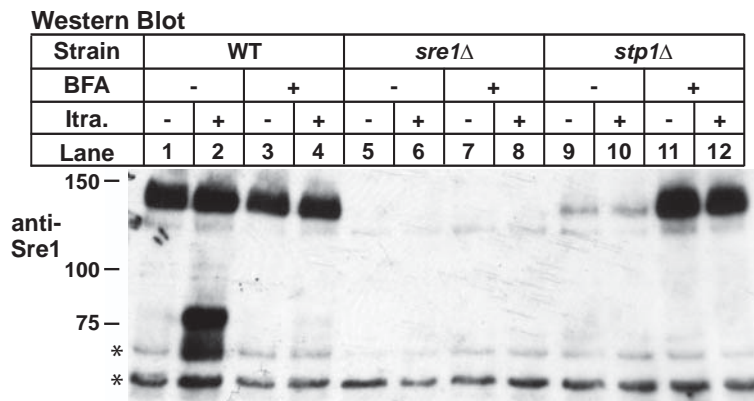

Table S1 –Strains used in this study

| Strain name | Genotype                    | Reference                    |
|-------------|-----------------------------|------------------------------|
| H99         | Wild-type serotype A        | Perfect <i>et al.</i> , 1980 |
| CBY22-1     | <i>sre1</i> Δ               | This study                   |
| CBY4-1      | <i>stp1</i> Δ               | This study                   |
| CBY23-1     | <i>sre1</i> Δ + <i>SRE1</i> | This study                   |
| CBY75-3     | <i>sre1</i> Δ+ <i>SRE1N</i> | This study                   |
| CBY81-3     | <i>stp1</i> Δ+ <i>STP1</i>  | This study                   |
| CBY78-3     | <i>stp1</i> Δ+ <i>SRE1N</i> | This study                   |

Table S2 –Oligos used for quantitative PCR analysis

| Gene         | Oligo ID | Sequence 5' to 3'     |
|--------------|----------|-----------------------|
| <i>SRE1</i>  | SRE1-F   | GAAGCGGATAAGCGTGATCT  |
| <i>SRE1</i>  | SRE1-R   | CCAATCCTGGCAAGAATGTC  |
| <i>STP1</i>  | STP1-F   | ACGAGAGAAGCCAAAGGTAG  |
| <i>STP1</i>  | STP1-R   | ATCATACCCCATCCGATGAC  |
| <i>ERG25</i> | ERG25-F  | AGTTTCAGGTGGTGGGACTA  |
| <i>ERG25</i> | ERG25-R  | TCATTCTTCTCAACAGCTGCA |
| <i>ERG3</i>  | ERG3-F   | GCAGACCAGTACTTTGACTC  |
| <i>ERG3</i>  | ERG3-R   | GGTCCCAGCTTCATCTATC   |
| <i>CTR4</i>  | CTR4-F   | CGTGGTTTCATCTATGGCAG  |
| <i>CTR4</i>  | CTR4-R   | GACAGTCTGACCCAAGAAGA  |
| <i>ACT1</i>  | ACT1-F   | CGTATGCAGAAGGAGATCAC  |
| <i>ACT1</i>  | ACT1-R   | TAGAACCACCGATCCAGACA  |
